# Supplementary material for: Highly dispersed palladium nanoparticles on poly(N1,N3-dimethylbenzimidazolium)iodide-functionalized multiwalled carbon nanotubes for ethanol oxidation in alkaline solution
Source: Royal Society of Chemistry journal article supplement (doi:10.1039/c6ra19256d), 2016-01-01
Supplement: c6ra19256d1.pdf [file c6ra19256d1.pdf]

## Supporting Information

### **Highly dispersed palladium nanoparticles on poly (N<sub>1</sub>, N<sub>3</sub>-dimethylbenzimidazolium) iodide-functionalized multiwalled carbon nanotubes for ethanol oxidation in alkaline solution**

Yan Lin <sup>‡a</sup>, Qi Liu <sup>‡b</sup>, Jinchun Fan <sup>\*a</sup>, Kexuan Liao <sup>a</sup>, Jiawei Xie <sup>a</sup>, Peng Liu <sup>a</sup>, Yihui Chen <sup>a</sup>, Yulin Min <sup>\*a</sup> and  
Qunjie Xu <sup>\*a</sup>

<sup>‡</sup> These authors contributed equally to this work.

<sup>a</sup> Shanghai Key Laboratory of Materials Protection and Advanced Materials in Electric Power, College of Environmental and Chemical Engineering, Shanghai University of Electric Power, Shanghai 200090, People's Republic of China.

<sup>b</sup> Shanghai Aerospace Energy Co., Ltd, Shanghai 201201, People's Republic of China.

\* Corresponding authors.

E-mail address: Jinchun.fan@shiep.edu.cn (J.C. Fan), minyulin@shiep.edu.cn (Y.L. Min),  
xuqunjie@shiep.edu.cn (Q.J. Xu)

Tel: +86 21 35303544

Fax: +86 21 35303544

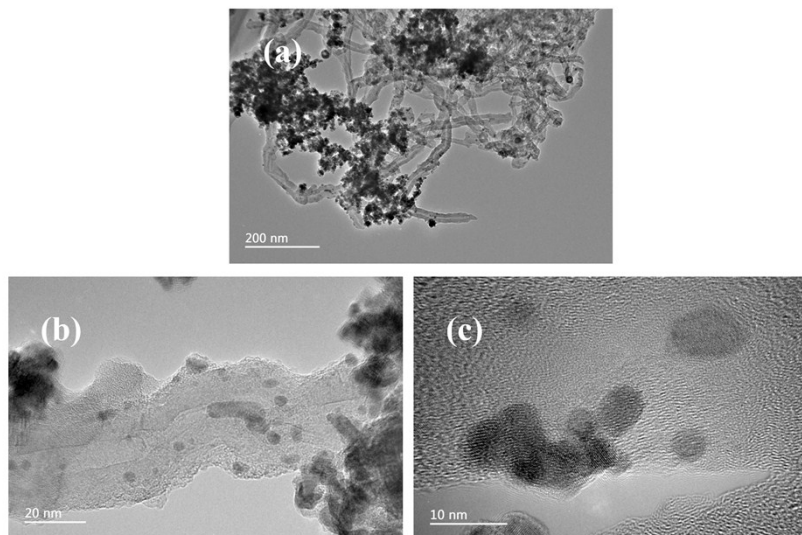

**Figure S1.** TEM images for Pd/PBI-f-MWCNTs-6:1.

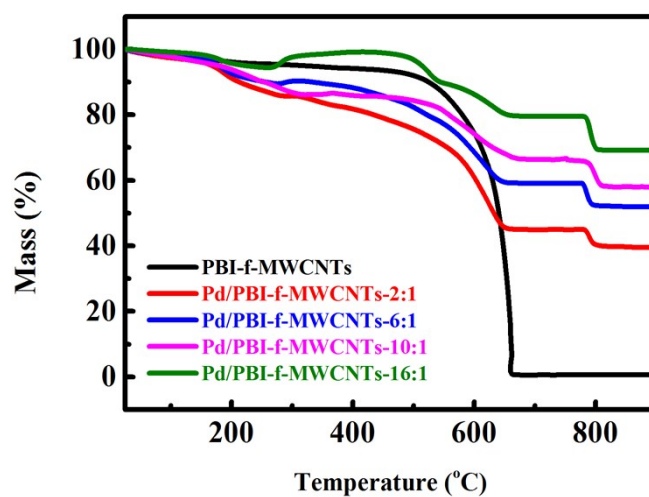

**Figure S2.** TGA curves for PBI-f-MWCNTs and Pd/PBI-f-MWCNTs with different feed ratios.

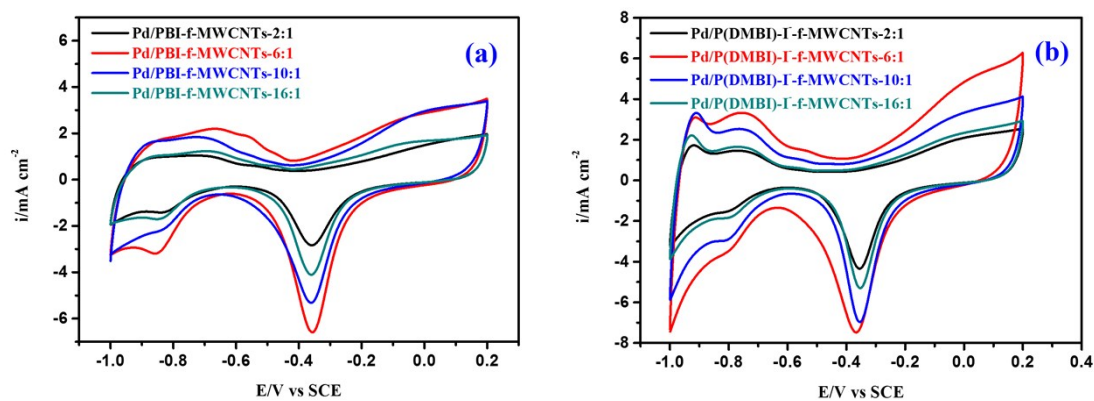

**Figure S3.** CVs of Pd/PBI-f-MWCNTs and Pd/P(DMBI)-f-MWCNTs with different feed weight ratios.
